# Supplementary material for: Passive-Cooling Building Coating with Efficient Cooling Performance and Excellent Superhydrophobicity
Source: Materials (Basel). 2023 Jul 25;16(15):5232. doi: 10.3390/ma16155232 (PMC10419716; doi:10.3390/ma16155232)
Supplement: Supplementary file 1 [file materials-16-05232-s001.zip]

Archive with 7 entries (7 files):
- Supplementary Materials.pdf
- Video S1.mp4
- Video S2.mp4
- Video S3.mp4
- Video S4.mp4
- Video S5.mp4
- Video S6.mp4
